# Supplementary material
Source: PubMed Central journal article supplement (PMC3408077)
Supplement: NIHMS276838-supplement-01.pdf [file NIHMS276838-supplement-01.pdf]

## **Supplemental Material**

### **METHODS IN DETAIL**

#### **Clinical evaluation of patients**

We performed transcriptomic analysis of heart tissue in matched cohorts of patients with IDCM (n=32) and myocarditis (n=16) selected from a biorepository containing samples from patients with new onset heart failure (HF; n=350). Patients underwent EMB as part of a comprehensive diagnostic evaluation of heart dysfunction that included history and physical exam, right-heart cardiac catheterization and echocardiography. All patients with history suggestive for ischemic heart disease or at least two standard risk factors for atherosclerosis were further evaluated with coronary angiography. Blood tests were performed for cardiac enzymes, thyroid-function and antinuclear antibodies.

Four to six biopsy specimens were obtained from each patient and examined by an experienced cardiac pathologist. In addition to standard staining, Congo red was used to identify amyloidosis and Prussian blue if hemochromatosis was suspected. If the diagnosis was unclear, additional special antibody stains were performed, such as immunofluorescence for IgG, IgM, IgA, C1q, C3d, C4d, fibrinogen, stains for AFB, fungi, elastosis, glycogen or iron accumulation.

Myocarditis was defined according to Dallas criteria<sup>1, 2</sup>, without additional tests for presence of viral RNA, such as PCR.

After this extensive evaluation, idiopathic dilated cardiomyopathy (IDCM) was a diagnosis of exclusion. In addition to diagnostic biopsies, one entirely independent sample was obtained and flash frozen in liquid nitrogen for microarray analysis. All participants gave written informed consent for collection of samples and clinical data. Right ventricular septal

EMBs were obtained by advancing a disposable bioptome (Argon; Jawz) via the right jugular vein under fluoroscopic guidance.

### **Selection of patients**

A total of 115 samples were used for microarray analysis, of which 81 were newly processed and 34 were obtained from a previously published study<sup>3</sup>. Forty-eight samples were selected for our first transcriptomic study. These included samples from patients with myocarditis (n=16) defined by the Dallas criteria<sup>1, 2</sup> and idiopathic dilated cardiomyopathy (IDCM, n=32) selected in a case-control fashion based on age, gender, functional parameters from echocardiography and right heart catheterization, and medication usage. In addition, we identified samples from 6 patients with myocarditis with divergent baseline criteria, from which we independently tested the diagnostic accuracy of the biomarker. Finally, the molecular signature was tested in secondary cardiomyopathies, such as stress induced cardiomyopathy (n=4), sarcoidosis (n=9), peripartum cardiomyopathy (n=6), arrhythmogenic right ventricular dysplasia (ARVD, n=3), giant cell myocarditis (n=3) and systemic lupus erythematosus (n=2). Data from a previous study<sup>3</sup> was used as an additional validation set, containing samples from normal heart (n=11), ischemic cardiomyopathy (n=8) and IDCM (n=15). These samples were analyzed with a prototype microarray, the Affytrix U133A Gene Chip to evaluate for intraplatform reproducibility.

### **RNA extraction and microarray hybridization**

Total RNA was extracted from biopsies as previously described<sup>4, 5</sup>. Quality control of integrity of RNA was performed with the 2100 Bioanalyzer (Agilent). MIAME guidelines were

followed for all steps of the procedure. The extracted RNA (average  $568 \pm 88\text{ng}$ ; Standard Error of the Mean (SEM)) was preprocessed with the Ovation Biotin RNA Amplification and Labeling System (NuGen, Cat. No. 2300-12) for subsequent hybridization with the Human Genome U133 Plus 2.0 Array from Affymetrix without additional amplification step.

Microarray data was normalized with Robust Multiarray Average (RMA) and analyzed with Significance Analysis of Microarrays (SAM) to identify differentially expressed genes in patients with myocarditis (n=16) vs IDCM (n=32). The resulting gene list was further processed with Meta Core pathway analysis incorporated in GeneGo (bioinformatics software, St. Joseph, MI). Organ- and species-specific pre-filtering was performed before network analysis, in order to extract solely pathways that are truly interrelated in the human heart. Each network was provided with a p-value, using the basic formula for hypergeometric distribution. This formula provides a value that represents the probability for a particular mapping of an experiment to a map (or network/process) to arise by chance, considering the numbers of genes in the experiment vs the number of genes in the map within the “full set” of all genes on maps. In addition, a z-score was calculated for each network, which reflects the saturation with genes from the experiment. A high z-score indicates a network that contains a large amount of genes from the experiment.

In order to determine the minimum number of differentially expressed genes required for detection of patients with myocarditis compared to IDCM, we used Prediction Analysis of Microarrays (PAM) to obtain a biomarker based upon a nearest shrunken centroid. The classifier was developed from a train set (n=33), consisting of 2/3 of data, and applied to an independent test set (n=15) containing 1/3 of data.

After developing the transcriptomic biomarker with a case-control design, we tested its performance in unmatched samples, to test its generalizability independent of age, gender, heart function or drug therapy. To test this hypothesis, we used samples from patients with myocarditis (n=6), who presented with higher ejection fractions ( $65 \pm 4.7\%$ ).

In order to test, if previously established classification algorithms can further reduce the number of genes necessary for accurate prediction, we applied misclassification-penalized posteriors classification (MiPP), which successfully predicts rejection in liver transplant recipients<sup>6</sup>. The MiPP package is an application in the R environment, which employs the libraries MASS for lda/qda (linear/quadratic discriminant analysis and e1071 for SVM (support vector machine). This software sequentially adds genes to a classification model based upon the Misclassification-Penalized Posteriors principle, which takes into account the likelihood that a sample belongs to a given class by using posterior probability of correct classification.

First we used MiPP, to test several different classification rules, to further reduce the novel molecular signature, consisting of 62 genes. We subsequently applied support vector machine with radial basis function (SVM-rbf) and lineal function (SVM-lin), quadratic discriminant analysis (qda), linear discriminant analysis (lda) and a combination of lda, qda and svm-rbf. When support vector machine algorithms are used for classification, the input data is plotted as two vectors in an n-dimensional space and a virtual hyperplane is created that best separates the two phenotypes. This hyperplane is then used to classify samples with unknown phenotypes. Linear discriminant analysis uses a linear combination of features, which best separate two or more classes. Quadratic discriminant analysis is closely related to lda, however there is no assumption that the covariance of each of the classes is identical. Models were

developed based upon 5-fold cross validation in a train set (2/3 of data) and subsequent validation in an independent test set (1/3 of data).

In order to evaluate, if distinct models are generated from additional random splits, we performed 50 random divisions to develop individual classification models, which were then validated in 200 independent splits. As an additional confirmatory test, we performed principal components analysis (PCA) to illustrate how well patients with myocarditis can be separated from patients with IDCM based on the original 62 genes molecular signature, and to test if genes that we identified by MiPP analysis to be the most robust classifiers, would also be discovered to be important when PCA was applied. PCA is a method that depicts the importance of genes for phenotypic classification by means of illustration through Eigen vectors towards a phenotype, in which the gene is overexpressed. If genes are less robust as classifiers, the corresponding vector directs towards the center with close to vertical direction. Important classifiers are depicted with vectors having endpoints far from the center.

### **Validation of microarrays with quantitative realtime RT-PCR**

Validation with realtime RT-PCR was performed in a randomly selected subset of patients (IDCM: n=10, myocarditis: n=10), with triplicates replication. First-strand cDNA was synthesized with a High-Capacity cDNA Reverse-Transcription Kit (Applied Biosystems Inc., CA, USA) from 100ng total RNA, which was amplified with MessageAmp II Amplification Kit (Applied Biosystems Inc., CA, USA). TaqMan probes, labeled with 6-carboxyfluorescein (FAM) were designed for a subset of 13 differentially expressed genes identified by microarray analysis: CD14, FCER1G, TLR1, TLR2, TLR7, ITGB2, SIGLEC 1, ADCY7, MEGF9, PTPPLAD1, SWAP70, MSI1, and LCE1E, as well as the housekeeping gene 18S RNA. Data

were analyzed by the threshold cycle (Ct) relative-quantification method (error bars = mean standard error). Finally, this molecular signature consisting of 13 genes was illustrated as a heatmap by an unsupervised hierarchical clustering approach in R based on Euclidean distance.

#### Reference List

- (1) Aretz HT. Myocarditis: the Dallas criteria. *Hum Pathol* 1987;18:619-24.
- (2) Baughman KL. Diagnosis of myocarditis: death of Dallas criteria. *Circulation* 2006;113:593-5.
- (3) Kittleson MM, Ye SQ, Irizarry RA, Minhas KM, Edness G, Conte JV, Parmigiani G, Miller LW, Chen Y, Hall JL, Garcia JG, and Hare JM. Identification of a gene expression profile that differentiates between ischemic and nonischemic cardiomyopathy. *Circulation* 2004;110:3444-51.
- (4) Heidecker B, Kasper EK, Wittstein IS, Champion HC, Breton E, Russell SD, Kittleson MM, Baughman KL, and Hare JM. Transcriptomic biomarkers for individual risk assessment in new-onset heart failure. *Circulation* 2008;118:238-46.
- (5) Heidecker B, Lamirault G, Kasper EK, Wittstein IS, Champion HC, Breton E, Russell SD, Hall JL, Kittleson MM, Baughman KL, and Hare JM. The gene expression profile of patients with new-onset heart failure reveals important gender-specific differences. *Eur Heart J* 2009. 31: 1188-96
- (6) Martinez-Llordella M, Lozano JJ, Puig-Pey I, Orlando G, Tisone G, Lerut J, Benitez C, Pons JA, Parrilla P, Ramirez P, Brugera M, Rimola A, Sanchez-Fueyo A. Using transcriptional profiling to develop a diagnostic test of operational tolerance in liver transplant recipients. *J Clin Invest* 2008; 118:2845-57.

**Supplemental table 1: Overexpressed genes in patients with myocarditis vs idiopathic dilated cardiomyopathy (q<5%, FC>2) and their biological function**

| Probe Set ID | Gene Symbol           | Gene Title                                                           | GO biological process term                                                                                                                                                                                                    |
|--------------|-----------------------|----------------------------------------------------------------------|-------------------------------------------------------------------------------------------------------------------------------------------------------------------------------------------------------------------------------|
| 1552302_at   | FLJ77644, TMEM106A    | similar to transmembrane protein 106A                                | NA                                                                                                                                                                                                                            |
| 1552553_a_at | NLRC4                 | NLR family, CARD domain containing 4                                 | apoptosis, caspase activation, defense response to bacterium , interleukin-1 beta secretion                                                                                                                                   |
| 1552584_at   | IL12RB1               | interleukin 12 receptor, beta 1                                      | cell surface receptor linked signal transduction, positive regulation of cell proliferation                                                                                                                                   |
| 1554899_s_at | FCER1G                | Fc fragment of IgE, high affinity I, receptor for; gamma polypeptide | positive regulation hypersensitivity, phagocytosis, engulfment, immunoglobulin mediated immune response, positive regulation of interleukin-6 and 10 and TNF production, positive regulation of mast cell cytokine production |
| 1555349_a_at | ITGB2                 | integrin, beta 2 (complement component 3 receptor 3 and 4 subunit)   | apoptosis, inflammatory response, cell adhesion , leukocyte adhesion, integrin-mediated signaling pathway                                                                                                                     |
| 1559584_a_at | C16orf54, hCG_1644884 | chromosome 16 open reading frame 54                                  | NA                                                                                                                                                                                                                            |
| 1563245_at   | MGST1                 | microsomal glutathione S-transferase 1                               | glutathione metabolic process                                                                                                                                                                                                 |
| 1565162_s_at | ANXA2                 | annexin A2                                                           | skeletal development                                                                                                                                                                                                          |
| 1568126_at   | SPP1                  | Secreted phosphoprotein 1                                            | ossification, cell adhesion                                                                                                                                                                                                   |
| 1568574_x_at | IFI30                 | interferon, gamma-inducible protein 30                               | oxidation reduction                                                                                                                                                                                                           |
| 201422_at    | CTSC                  | cathepsin C                                                          | proteolysis, immune response                                                                                                                                                                                                  |
| 201487_at    | LAPTM5                | lysosomal multspanning membrane protein 5                            | transport                                                                                                                                                                                                                     |
| 201721_s_at  | CD14                  | CD14 molecule                                                        | response to molecule of bacterial origin , phagocytosis, apoptosis, inflammatory response                                                                                                                                     |
| 201743_at    | CAPG                  | capping protein (actin filament), gelsolin-like                      | protein complex assembly, cell projection biogenesis                                                                                                                                                                          |
| 201850_at    | PLTP                  | phospholipid transfer protein                                        | lipid metabolic process, transport                                                                                                                                                                                            |
| 202075_s_at  | VAMP8                 | vesicle-associated membrane protein 8 (endobrevin)                   | vesicle-mediated transport                                                                                                                                                                                                    |

| Probe Set ID | Gene Symbol | Gene Title                                                                                                       | GO biological process term                                                                                                                                                                                            |
|--------------|-------------|------------------------------------------------------------------------------------------------------------------|-----------------------------------------------------------------------------------------------------------------------------------------------------------------------------------------------------------------------|
| 202546_at    | LYN         | v-yes-1 Yamaguchi sarcoma viral related oncogene homolog                                                         | protein amino acid phosphorylation, intracellular signaling cascade, positive regulation of cell proliferation, response to hormone stimulus, erythrocyte differentiation, interspecies interaction between organisms |
| 202625_at    | ITGB2       | integrin, beta 2 (complement component 3 receptor 3 and 4 subunit)                                               | apoptosis, inflammatory response, cell adhesion, leukocyte adhesion, integrin-mediated signaling pathway, neutrophil chemotaxis                                                                                       |
| 202803_s_at  | PCK2        | phosphoenolpyruvate carboxykinase 2 (mitochondrial)                                                              | gluconeogenesis                                                                                                                                                                                                       |
| 202847_at    | CSF1R       | colony stimulating factor 1 receptor                                                                             | protein amino acid phosphorylation, signal transduction, transmembrane receptor protein tyrosine kinase signaling pathway, multicellular organismal development, cell proliferation                                   |
| 203104_at    | RASSF2      | Ras association (RalGDS/AF-6) domain family member 2                                                             | cell cycle, signal transduction, negative regulation of cell cycle                                                                                                                                                    |
| 203185_at    | RPS6KA1     | ribosomal protein S6 kinase, 90kDa, polypeptide 1                                                                | protein amino acid phosphorylation, signal transduction, protein kinase cascade                                                                                                                                       |
| 203379_at    | CD53        | CD53 molecule                                                                                                    | signal transduction                                                                                                                                                                                                   |
| 203416_at    | PLEK        | pleckstrin                                                                                                       | intracellular signaling cascade                                                                                                                                                                                       |
| 203471_s_at  | SEMA4D      | sema domain, immunoglobulin domain (Ig), transmembrane domain (TM) and short cytoplasmic domain, (semaphorin) 4D | NA                                                                                                                                                                                                                    |
| 203528_at    | CD163       | CD163 molecule                                                                                                   | acute-phase response, inflammatory response                                                                                                                                                                           |
| 203645_s_at  | PLA2G2A     | phospholipase A2, group IIA (platelets, synovial fluid)                                                          | phospholipid metabolic process , lipid catabolic process                                                                                                                                                              |
| 203649_s_at  | CXCL9       | chemokine (C-X-C motif) ligand 9                                                                                 | chemotaxis, defense response, inflammatory response, cellular defense response, G-protein coupled receptor protein signaling pathway                                                                                  |
| 203915_at    | CYBB        | cytochrome b-245, beta polypeptide                                                                               | superoxide metabolic process, ion transport, inflammatory response, superoxide release, innate immune response                                                                                                        |
| 203923_s_at  | IRF8        | interferon regulatory factor 8                                                                                   | transcription, immune response, myeloid cell differentiation                                                                                                                                                          |



| Probe Set ID | Gene Symbol | Gene Title                                                                        | GO biological process term                                                                                                                      |
|--------------|-------------|-----------------------------------------------------------------------------------|-------------------------------------------------------------------------------------------------------------------------------------------------|
| 204057_at    | CD48        | CD48 molecule                                                                     | defense response                                                                                                                                |
| 204118_at    | TYROBP      | TYRO protein tyrosine kinase binding protein                                      | cellular defense response, intracellular signaling cascade                                                                                      |
| 204122_at    | GLIPR1      | GLI pathogenesis-related 1                                                        | NA                                                                                                                                              |
| 204222_s_at  | FCER1G      | Fc fragment of IgE, high affinity I, receptor for; gamma polypeptide              | positive regulation of hypersensitivity, positive regulation of interleukin-10 and 6 and tumor necrosis factor production, mast cell activation |
| 204232_at    | PLEKHO2     | pleckstrin homology domain containing, family O member 2                          | NA                                                                                                                                              |
| 204436_at    | CD44        | CD44 molecule                                                                     | cell adhesion, cell-matrix adhesion                                                                                                             |
| 204490_s_at  | SLC7A7      | solute carrier family 7 (cationic amino acid transporter, y+ system), member 7    | amino acid metabolic process, transport                                                                                                         |
| 204588_s_at  | STC1        | stanniocalcin 1                                                                   | cellular calcium ion homeostasis, cell surface receptor linked signal transduction                                                              |
| 204595_s_at  | CD52        | CD52 molecule                                                                     | elevation of cytosolic calcium ion concentration, respiratory burst                                                                             |
| 204661_at    | VSIG4       | V-set and immunoglobulin domain containing 4                                      | negative regulation of interleukin-2 production, negative regulation of T cell proliferation                                                    |
| 204787_at    | IL10RA      | interleukin 10 receptor, alpha                                                    | NA                                                                                                                                              |
| 204912_at    | SASH3       | SAM and SH3 domain containing 3                                                   | NA                                                                                                                                              |
| 204923_at    | TLR2        | toll-like receptor 2                                                              | response to molecule of fungal origin, MyD88-dependent toll-like receptor signaling pathway, induction of apoptosis                             |
| 204924_at    | CSTA        | cystatin A (stefin A)                                                             | peptide cross-linking                                                                                                                           |
| 204971_at    | CCR1        | chemokine (C-C motif) receptor 1                                                  | chemotaxis, G-protein coupled receptor protein signaling pathway, response to wounding                                                          |
| 205098_at    | LCP2        | lymphocyte cytosolic protein 2 (SH2 domain containing leukocyte protein of 76kDa) | immune response, transmembrane receptor protein tyrosine kinase signaling pathway, mast cell activation, cytokine secretion                     |
| 205270_s_at  | GZMA        | granzyme A (granzyme 1, cytotoxic T-lymphocyte-associated serine esterase 3)      | proteolysis, apoptosis, cleavage of lamin, immune response, cytolysis                                                                           |
| 205488_at    | CD86        | CD86 molecule                                                                     | immune response, positive regulation of cell proliferation, T cell activation                                                                   |

| Probe Set ID | Gene Symbol    | Gene Title                                                                                     | GO biological process term                                                                                                                                                                                                                                                                                                                                     |
|--------------|----------------|------------------------------------------------------------------------------------------------|----------------------------------------------------------------------------------------------------------------------------------------------------------------------------------------------------------------------------------------------------------------------------------------------------------------------------------------------------------------|
| 205685_at    | CD8A           | CD8a molecule                                                                                  | immune response, transmembrane receptor<br>protein tyrosine kinase signaling pathway, T cell<br>activation                                                                                                                                                                                                                                                     |
| 205758_at    | ITGAM          | integrin, alpha M (complement component 3<br>receptor 3 subunit)                               | cell adhesion, integrin-mediated signaling<br>pathway                                                                                                                                                                                                                                                                                                          |
| 205786_s_at  | LY86           | lymphocyte antigen 86                                                                          | apoptosis, humoral immune response, cell<br>proliferation                                                                                                                                                                                                                                                                                                      |
| 205859_at    | PTPN6          | protein tyrosine phosphatase, non-receptor type<br>6                                           | protein amino acid dephosphorylation, apoptosis,<br>response to wounding                                                                                                                                                                                                                                                                                       |
| 206687_s_at  | CCR2, FLJ78302 | chemokine (C-C motif) receptor 2                                                               | chemotaxis, inflammatory response, cellular<br>defense response, JAK-STAT cascade,<br>interspecies interaction between organisms                                                                                                                                                                                                                               |
| 206978_at    | PTPRC          | protein tyrosine phosphatase, receptor type, C                                                 | negative regulation of T cell mediated<br>cytotoxicity, positive regulation of B cell<br>proliferation, defense response to virus                                                                                                                                                                                                                              |
| 207238_s_at  | SYK            | spleen tyrosine kinase                                                                         | serotonin secretion, leukocyte adhesion<br>neutrophil chemotaxis, interspecies interaction<br>between organisms , positive regulation of<br>interleukin-3 biosynthetic process, positive<br>regulation of B cell differentiation, positive<br>regulation of gamma-delta T cell differentiation,<br>positive regulation of alpha-beta T cell<br>differentiation |
| 207540_s_at  | LILRB2         | leukocyte immunoglobulin-like receptor,<br>subfamily B (with TM and ITIM domains),<br>member 2 | immune response, cellular defense                                                                                                                                                                                                                                                                                                                              |
| 207697_x_at  | LCPI           | lymphocyte cytosolic protein 1 (L-plastin)                                                     | actin filament bundle formation                                                                                                                                                                                                                                                                                                                                |
| 208885_at    | CORO1A         | coronin, actin binding protein, 1A                                                             | phagocytosis                                                                                                                                                                                                                                                                                                                                                   |
| 209083_at    | HLA-DQB1       | major histocompatibility complex, class II, DQ<br>beta 1                                       | antigen processing and presentation of peptide or<br>polysaccharide antigen via MHC class II,<br>immune response                                                                                                                                                                                                                                               |
| 209480_at    | DLK1           | delta-like 1 homolog (Drosophila)                                                              | multicellular organismal development                                                                                                                                                                                                                                                                                                                           |
| 209560_s_at  | CD44           | CD44 molecule (Indian blood group)                                                             | cell adhesion, cell-matrix adhesion                                                                                                                                                                                                                                                                                                                            |
| 209835_x_at  | SPP1           | secreted phosphoprotein 1                                                                      | ossification, cell adhesion                                                                                                                                                                                                                                                                                                                                    |

| Probe Set ID | Gene Symbol                                | Gene Title                                                                                                     | GO biological process term                                                                                                                                                                            |
|--------------|--------------------------------------------|----------------------------------------------------------------------------------------------------------------|-------------------------------------------------------------------------------------------------------------------------------------------------------------------------------------------------------|
| 209875_s_at  | AIF1                                       | allograft inflammatory factor 1                                                                                | response to stress, inflammatory response, cell cycle arrest, negative regulation of cell proliferation                                                                                               |
| 209901_x_at  | C3AR1                                      | complement component 3a receptor 1                                                                             | chemotaxis, inflammatory response, G-protein coupled receptor protein signaling pathway                                                                                                               |
| 209906_at    | CD300A                                     | CD300a molecule                                                                                                | immune response, cell adhesion                                                                                                                                                                        |
| 209933_s_at  | NCF2                                       | neutrophil cytosolic factor 2                                                                                  | cellular defense response                                                                                                                                                                             |
| 209949_at    | LILRB2                                     | leukocyte immunoglobulin-like receptor, subfamily B (with TM and ITIM domains), member 2                       | immune response, cellular defense response, cell surface receptor linked signal transduction                                                                                                          |
| 210146_x_at  | TLR1                                       | toll-like receptor 1                                                                                           | inflammatory response, macrophage activation, positive regulation of tumor necrosis factor biosynthetic process, positive regulation of interleukin-6 biosynthetic process                            |
| 210176_at    | LAIR1                                      | leukocyte-associated immunoglobulin-like receptor 1                                                            | immune response                                                                                                                                                                                       |
| 210644_s_at  | LILRB1                                     | leukocyte immunoglobulin-like receptor, subfamily B (with TM and ITIM domains), member 1                       | immune response, response to virus                                                                                                                                                                    |
| 211336_x_at  | TRBC1, TRBC2, TRBV19                       | T cell receptor beta constant 1, T cell receptor beta constant 2, T cell receptor beta variable 19             | immune response                                                                                                                                                                                       |
| 211796_s_at  | CD44                                       | CD44 molecule                                                                                                  | cell adhesion, cell-matrix adhesion                                                                                                                                                                   |
| 212063_at    | PTPRC                                      | protein tyrosine phosphatase, receptor type, C                                                                 | negative regulation of T cell mediated cytotoxicity, cell surface receptor linked signal transduction, T cell differentiation, positive regulation of B cell proliferation, defense response to virus |
| 212587_s_at  |                                            |                                                                                                                |                                                                                                                                                                                                       |
| 212588_at    | HLA-DQA1, HLA-DQA2                         | major histocompatibility complex, class II, DQ alpha 1, major histocompatibility complex, class II, DQ alpha 2 | antigen processing and presentation of peptide or polysaccharide antigen via MHC class II                                                                                                             |
| 212671_s_at  | hCG_1998957, HLA-DQB1/B2, HLA-DRB1/2/3/4/5 | major histocompatibility complex, class II, DQ beta 1 and 2; DR beta1,2,3,4 and 5                              | antigen processing and presentation of peptide or polysaccharide antigen via MHC class II                                                                                                             |

| Probe Set ID | Gene Symbol    | Gene Title                                                                                                                                                                                                  | GO biological process term                                                                              |
|--------------|----------------|-------------------------------------------------------------------------------------------------------------------------------------------------------------------------------------------------------------|---------------------------------------------------------------------------------------------------------|
| 212999_x_at  | AIF1           | allograft inflammatory factor 1                                                                                                                                                                             | response to stress, inflammatory response, cell cycle arrest                                            |
| 213095_x_at  | DOCK2          | dedicator of cytokinesis 2                                                                                                                                                                                  | actin cytoskeleton organization and biogenesis, lymphocyte chemotaxis                                   |
| 213160_at    | HSPA6          | heat shock 70kDa protein 6 (HSP70B')                                                                                                                                                                        | response to stress                                                                                      |
| 213418_at    | RNASE6         | ribonuclease, RNase A family, k6                                                                                                                                                                            | RNA catabolic process, defense response                                                                 |
| 213566_at    | RAC2           | ras-related C3 botulinum toxin substrate 2 (rho family, small GTP binding protein Rac2)                                                                                                                     | chemotaxis, positive regulation of cell proliferation, regulation of respiratory burst                  |
| 213603_s_at  | MYO1F          | myosin IF                                                                                                                                                                                                   | NA                                                                                                      |
| 213733_at    | HLA-DQA1       | major histocompatibility complex, class II, DQ alpha 1                                                                                                                                                      | antigen processing and presentation of peptide or polysaccharide antigen via MHC class II               |
| 213831_at    | LYZ            | lysozyme (renal amyloidosis)                                                                                                                                                                                | tRNA aminoacylation for protein translation, inflammatory response, defense response to bacterium       |
| 213975_s_at  | LOC648998      | similar to Neutrophil cytosol factor 1 (NCF-1) (Neutrophil NADPH oxidase factor 1) (47 kDa neutrophil oxidase factor) (p47-phox) (NCF-47K) (47 kDa autosomal chronic granulomatous disease protein) (NOXO2) | NA                                                                                                      |
| 214084_x_at  | CD163          | CD163 molecule                                                                                                                                                                                              | acute-phase response, inflammatory response                                                             |
| 215049_x_at  | AIF1           | allograft inflammatory factor 1                                                                                                                                                                             | response to stress, inflammatory response, cell cycle arrest, negative regulation of cell proliferation |
| 215051_x_at  | ADA            | adenosine deaminase                                                                                                                                                                                         | response to hypoxia, adenosine catabolic process, T cell activation                                     |
| 216705_s_at  | FCGR1A, FCGR1C | Fc fragment of IgG, high affinity Ia, Ic, receptor (CD64)                                                                                                                                                   | phagocytosis, engulfment                                                                                |
| 216950_s_at  | GLUL           | glutamate-ammonia ligase (glutamine synthetase)                                                                                                                                                             | glutamine biosynthetic process, nitrogen compound metabolic process                                     |
| 217202_s_at  | SNX10          | sorting nexin 10                                                                                                                                                                                            | transport, cell communication                                                                           |
| 218404_at    | MAFB           | v-maf musculoaponeurotic fibrosarcoma oncogene homolog B (avian)                                                                                                                                            | transcription                                                                                           |
| 218559_s_at  | CCDC109B       | coiled-coil domain containing 109B                                                                                                                                                                          | NA                                                                                                      |
| 218802_at    | BIN2           | bridging integrator 2                                                                                                                                                                                       | NA                                                                                                      |

| Probe Set ID | Gene Symbol | Gene Title                                                        | GO biological process term                                                                                                                                                |
|--------------|-------------|-------------------------------------------------------------------|---------------------------------------------------------------------------------------------------------------------------------------------------------------------------|
| 219191_s_at  | DOCK10      | dedicator of cytokinesis 10                                       | NA                                                                                                                                                                        |
| 219279_at    | SLAMF8      | SLAM family member 8                                              | NA                                                                                                                                                                        |
| 219386_s_at  | SIGLEC1     | sialic acid binding Ig-like lectin 1, sialoadhesin                | inflammatory response, cell adhesion, cell-matrix adhesion, cell-cell adhesion                                                                                            |
| 219519_s_at  | 1-Mar       | membrane-associated ring finger (C3HC4) 1                         | NA                                                                                                                                                                        |
| 219574_at    | MS4A4A      | membrane-spanning 4-domains, subfamily A, member 4                | signal transduction                                                                                                                                                       |
| 219607_s_at  | MS4A6A      |                                                                   |                                                                                                                                                                           |
| 219666_at    | GAL3ST4     | galactose-3-O-sulfotransferase 4                                  | sulfur metabolic process, cell-cell signaling, biosynthetic process                                                                                                       |
| 219815_at    | PSTPIP2     | proline-serine-threonine phosphatase interacting protein 2        | NA                                                                                                                                                                        |
| 219938_s_at  | TLR7        | toll-like receptor 7                                              | inflammatory response, positive regulation of interferon-gamma biosynthetic process, positive regulation of interleukin-8 biosynthetic process, defense response to virus |
| 220146_at    | COTL1       | coactosin-like 1 (Dictyostelium)                                  | carbohydrate metabolic process                                                                                                                                            |
| 221059_s_at  | NPL         | N-acetylneuraminate pyruvate lyase (dihydrodipicolinate synthase) | carbohydrate metabolic process                                                                                                                                            |
| 221210_s_at  | SH3BGRL3    | SH3 domain binding glutamic acid-rich protein like 3              | NA                                                                                                                                                                        |
| 221269_s_at  | PYCARD      | PYD and CARD domain containing                                    | proteolysis, apoptosis, tumor necrosis factor-mediated signaling pathway, positive regulation of interleukin-1 beta secretion                                             |
| 221666_s_at  | CLEC7A      | C-type lectin domain family 7, member A                           | phagocytosis, recognition, inflammatory response, T cell activation, defense response to protozoan                                                                        |
| 221698_s_at  | OBFC2A      | oligonucleotide/oligosaccharide-binding fold containing 2A        | NA                                                                                                                                                                        |
| 222872_x_at  | CENTA2      | centaurin, alpha 2                                                | heart development                                                                                                                                                         |
| 222876_s_at  | MS4A7       | membrane-spanning 4-domains, subfamily A, member 7                | signal transduction                                                                                                                                                       |
| 223343_at    |             |                                                                   |                                                                                                                                                                           |
| 223344_s_at  | MS4A6A      | membrane-spanning 4-domains, subfamily A,                         | signal transduction                                                                                                                                                       |

| Probe Set ID | Gene Symbol | Gene Title                                                                               | GO biological process term                                                                                    |
|--------------|-------------|------------------------------------------------------------------------------------------|---------------------------------------------------------------------------------------------------------------|
|              |             | member 6A                                                                                |                                                                                                               |
| 223922_x_at  |             |                                                                                          |                                                                                                               |
| 224356_x_at  | MS4A4A      | membrane-spanning 4-domains, subfamily A, member 4                                       | signal transduction                                                                                           |
| 224357_s_at  | COTL1       | coactosin-like 1 (Dictyostelium)                                                         | NA                                                                                                            |
| 224583_at    | BCAT1       | branched chain aminotransferase 1, cytosolic                                             | G1/S transition of mitotic cell cycle, metabolic process, cell proliferation, amino acid biosynthetic process |
| 225285_at    | C1QC        | complement component 1, q subcomponent, C chain                                          | phosphate transport, complement activation, classical pathway                                                 |
| 225353_s_at  | CTSC        | cathepsin C                                                                              | proteolysis, immune response                                                                                  |
| 225646_at    | CTSC        |                                                                                          |                                                                                                               |
| 225647_s_at  | BCAT1       | branched chain aminotransferase 1, cytosolic                                             | G1/S transition of mitotic cell cycle, metabolic process, cell proliferation, amino acid biosynthetic process |
| 226517_at    | MPEG1       | macrophage expressed gene 1                                                              | NA                                                                                                            |
| 226818_at    |             |                                                                                          |                                                                                                               |
| 226841_at    | FYB         | FYN binding protein (FYB-120/130)                                                        | carbohydrate metabolic process, protein amino acid phosphorylation, immune response, signal transduction      |
| 227266_s_at  | RILPL2      | Rab interacting lysosomal protein-like 2                                                 | NA                                                                                                            |
| 227983_at    | OSR1        | odd-skipped related 1 (Drosophila)                                                       | heart development                                                                                             |
| 228399_at    | C1orf162    | chromosome 1 open reading frame 162                                                      | NA                                                                                                            |
| 228532_at    | LILRB1      | Leukocyte immunoglobulin-like receptor, subfamily B (with TM and ITIM domains), member 1 | immune response, response to virus                                                                            |
| 230741_at    | MRO         | maestro                                                                                  | NA                                                                                                            |
| 231358_at    | CTSS        | cathepsin S                                                                              | proteolysis, immune response                                                                                  |
| 232617_at    | DOCK8       | dedicator of cytokinesis 8                                                               | NA                                                                                                            |
| 232843_s_at  | OBFC2A      | oligonucleotide/oligosaccharide-binding fold containing 2A                               | NA                                                                                                            |
| 233085_s_at  | PARVG       | parvin, gamma                                                                            | cell adhesion, cell-matrix adhesion                                                                           |
| 234987_at    | CPM         | carboxypeptidase M                                                                       | proteolysis, anatomical structure morphogenesis                                                               |
| 235019_at    | HAVCR2      | hepatitis A virus cellular receptor 2                                                    | NA                                                                                                            |

| Probe Set ID | Gene Symbol | Gene Title                                                           | GO biological process term                                          |
|--------------|-------------|----------------------------------------------------------------------|---------------------------------------------------------------------|
| 235458_at    | CCL18       | chemokine (C-C motif) ligand 18 (pulmonary and activation-regulated) | chemotaxis, inflammatory response                                   |
| 32128_at     | CD52        | CD52 molecule                                                        | elevation of cytosolic calcium ion concentration, respiratory burst |
| 34210_at     | MAFF        | v-maf musculoaponeurotic fibrosarcoma oncogene homolog F (avian)     | response to stress, regulation of transcription                     |
| 36711_at     | SIGLEC1     | sialic acid binding Ig-like lectin 1, sialoadhesin                   | inflammatory response, cell adhesion, cell-matrix adhesion          |

**Supplemental table 2: Downregulated genes in patients with myocarditis vs idiopathic dilated cardiomyopathy (q<5%, FC>2) and their biological function**

| Probe Set ID | Gene Symbol | Gene Title                             | GO biological process term                                                                                |
|--------------|-------------|----------------------------------------|-----------------------------------------------------------------------------------------------------------|
| 1552411_at   | DEFB106A /B | defensin, beta 106A                    | defense response, defense response to bacterium                                                           |
| 1556721_at   | FLJ33706    | hypothetical protein FLJ33706          | NA                                                                                                        |
| 1559224_at   | LCE1E       | late cornified envelope 1E             | keratinization                                                                                            |
| 1562256_at   | NLRP1       | NLR family, pyrin domain containing 1  | induction of apoptosis, caspase activation, defense response                                              |
| 1562257_x_at |             |                                        |                                                                                                           |
| 1562785_at   | HERC6       | Hect domain and RLD 6                  | protein modification process                                                                              |
| 1564281_at   | LOC285708   | hypothetical protein LOC285708         | nucleotide and nucleic acid metabolic process, nervous system development                                 |
| 1564362_x_at | ZNF843      | zinc finger protein 843                | NA                                                                                                        |
| 1569568_at   | NA          | NA                                     | NA                                                                                                        |
| 1569569_x_at | NA          | NA                                     | NA                                                                                                        |
| 213609_s_at  | SEZ6L       | seizure related 6 homolog (mouse)-like | NA                                                                                                        |
| 213791_at    | PENK        | proenkephalin                          | behavioral fear response, signal transduction, neuropeptide signaling pathway, sensory perception of pain |
| 224209_s_at  | GDA         | guanine deaminase                      | nucleotide and nucleic acid metabolic process, nervous system development                                 |

| Probe Set ID | Gene Symbol | Gene Title                 | GO biological process term |
|--------------|-------------|----------------------------|----------------------------|
| 231628_s_at  | NA          | NA                         | NA                         |
| 243909_x_at  | GUSBL2      | glucuronidase, beta-like 2 | NA                         |
| 244891_x_at  | NA          | NA                         | NA                         |

### Supplemental table 3: Overexpressed pathways in patients with myocarditis vs idiopathic dilated cardiomyopathy

| Network                                                                                                                                                                                                         | GO Processes                                                                                                                                                                                                                                                                                                                      | Total nodes | Root nodes | p-Value  | zScore |
|-----------------------------------------------------------------------------------------------------------------------------------------------------------------------------------------------------------------|-----------------------------------------------------------------------------------------------------------------------------------------------------------------------------------------------------------------------------------------------------------------------------------------------------------------------------------|-------------|------------|----------|--------|
| MafB, MafF, MHC class II, CD44, BCAT1 (Homo sapiens)                                                                                                                                                            | system development (66.0%; 2.241e-13), response to stimulus (74.5%; 1.751e-12), multicellular organismal development (68.1%; 7.914e-12), organ development (55.3%; 2.289e-11), positive regulation of cellular process (51.1%; 9.353e-11)                                                                                         | 50          | 10         | 2.43E-17 | 29.34  |
| CCR2, BCAT1, ADA, Annexin II, Pleckstrin (Homo sapiens)                                                                                                                                                         | response to external stimulus (53.8%; 2.384e-09), intracellular signaling cascade (57.7%; 1.087e-08), behavior (38.5%; 4.275e-08), response to chemical stimulus (53.8%; 8.258e-08), MAPKKK cascade (26.9%; 1.123e-07)                                                                                                            | 50          | 7          | 1.97E-12 | 24.29  |
| p47-phox, CCR2, p67-phox, Pleckstrin, IL-12 receptor (Homo sapiens)                                                                                                                                             | protein kinase cascade (48.8%; 2.208e-20), intracellular signaling cascade (68.3%; 6.669e-18), response to chemical stimulus (61.0%; 1.232e-14), regulation of cell migration (29.3%; 3.132e-14), MAPKKK cascade (31.7%; 3.194e-14)                                                                                               | 50          | 7          | 1.53E-11 | 21.11  |
| C1q, CD44, CD14, SLAP-130(ADAP), alpha-4/beta-1 integrin (Homo sapiens)                                                                                                                                         | cell-matrix adhesion (30.4%; 2.499e-10), cell-substrate adhesion (30.4%; 4.574e-10), positive regulation of biological process (69.6%; 1.047e-09), cell adhesion (47.8%; 2.037e-08), biological adhesion (47.8%; 2.037e-08)                                                                                                       | 24          | 4          | 2.85E-07 | 16.72  |
| Plastin, IRT-1 (Homo sapiens)                                                                                                                                                                                   | actin filament bundle formation (100.0%; 1.902e-05), actin filament organization (100.0%; 5.224e-05), actin cytoskeleton organization (100.0%; 4.702e-04), actin filament-based process (100.0%; 5.330e-04), macrophage activation (50.0%; 2.438e-03)                                                                             | 2           | 2          | 5.36E-06 | 29.3   |
| CD163, HP/HB complex (Homo sapiens)                                                                                                                                                                             | acute inflammatory response (100.0%; 1.664e-04), response to L-ascorbic acid (50.0%; 4.879e-04), nitric oxide transport (50.0%; 4.879e-04), inflammatory response (100.0%; 1.161e-03), response to magnesium ion (50.0%; 1.341e-03)                                                                                               | 2           | 1          | 4.64E-03 | 14.62  |
| Complement component C1, Complement C4 = Complement component C4a + Complement component C4b, Complement C2 = Complement component C2a + Complement component C2b, Complement component C4a, C4a (Homo sapiens) | complement activation, classical pathway (100.0%; 3.660e-03), glial cell differentiation (100.0%; 3.904e-03), humoral immune response mediated by circulating immunoglobulin (100.0%; 4.026e-03), activation of plasma proteins during acute inflammatory response (100.0%; 4.819e-03), complement activation (100.0%; 4.819e-03) | 8           | 1          | 1.16E-02 | 9.18   |



|                                                                                                                                |                                                                                                                                                                                                                                                    |    |   |          |      |
|--------------------------------------------------------------------------------------------------------------------------------|----------------------------------------------------------------------------------------------------------------------------------------------------------------------------------------------------------------------------------------------------|----|---|----------|------|
| PLTP, ABCA1, CREB1, Cholesterol extracellular region, Cholesterol + ATP + H(2)O = Cholesterol + ADP + PO(4)(3-) (Homo sapiens) | response to drug (60.0%; 7.494e-05), platelet dense granule organization and biogenesis (20.0%; 3.050e-04), response to vitamin K (20.0%; 3.050e-04), response to menaquinone (20.0%; 3.050e-04), positive regulation of growth (40.0%; 3.354e-04) | 19 | 1 | 3.88E-02 | 4.84 |
|--------------------------------------------------------------------------------------------------------------------------------|----------------------------------------------------------------------------------------------------------------------------------------------------------------------------------------------------------------------------------------------------|----|---|----------|------|

---
